# Supplementary material
Source: PubMed Central journal article supplement (PMC2414291)

Supplementary Fig. 1. **An alignment of the primary sequence of LGP2 and the helicase domain of Hef.** A. The alignment is designed to emphasize the six motifs found in helicases, each in a different color. The Sequence alignment of LGP2 (Swissprot accession number Q96C10) and Hef (pdb accession number 1WP9) was carried out using NCBI's BLASTP version 2.2.17. B. The location of the six motifs within Hef is shown in two orientations of Hef, and the colors correspond to the motifs shown in the sequence alignments.

**A**

|        |     |                                                               |     |
|--------|-----|---------------------------------------------------------------|-----|
| LGP2   | 1   | -----MELRSYQWEVIMPALGKNI I IWLPTGAGKTRAAAYVAKRHLETVDGAKVTVL   | I   |
| Hef    | 1   | MVLRRLDIQPRIYQ-EVIYAKCKETNCLIVLPTGLGKTLIAQKIAEYRLTKY-GGKVLML  |     |
|        |     | la                                                            |     |
| LGP2   | 54  | VNRVHLVYQHGEEFRSMLD-GRNTVTTLSDMGSPRAGFGHLARCHDLLICTAELLQMALI  |     |
| Hef    | 59  | APTKEPLVLQMAESFRALFNLPPEKIVALTGKSPERSKAMARAK-VIVATPQTIEHDLI   |     |
|        |     | II                                                            | III |
| LGP2   | 110 | SPREEEHVELTVFSLIVVDECHHTKDTVYVWVINSQYLELKLQRAQPLPQVLGLTASPGI  |     |
| Hef    | 119 | A----GRISLELVSLIVFDEAMRAVGNVAYVFIAREY-----KRQAKNPLVIGLTASPGS  |     |
| LGP2   | 170 | GGASHLDGAINHVLQLCANLDTWCIMSPQCCPQLQEHSSQPCRQYNLCHRRSQDPFGDL   |     |
| Hef    | 169 | -----TPEKINEVINLGIETIEYRSSENSPDVRFYVVG--IRFEMVVRVDLPEIYKEV    |     |
| LGP2   | 200 | LKKINDQIHDHLE-----MPELSRKFGTQMYEQVVKLSEAAALAGLQEQRVYA         |     |
| Hef    | 219 | RKLLREMLRDALKPLAETGLLESSSPDIPFK--EVLRAQGIINEENAKGNHDLRGLLLYH  |     |
| LGP2   | 292 | LHLRRYNDALLINDTVRAVDALAALQDFYREHVTKTQILCAERALLALFDDRQNE----   |     |
| Hef    | 277 | AMALKLNHAIKLELLETQGLSALRAYIKKLYEAKAGST-----KASKEIFSDKRNKKAIS  |     |
|        |     | IV                                                            | V   |
| LGP2   | 309 | -LAKLATHGPNPKLEMLEKILQRQFSSNSPRGII FTTRQSAHSLLLWLQQQQQLQTV    |     |
| Hef    | 301 | LLVQAKIEIGLDNPFQDKLKEI IREQLQRKQMSKIIVFTNYRETAKKIV-----NELVKD |     |
| LGP2   | 397 | DIRAQLLIGAGNSSQSTHNTQRDQQEVIQKFGDGLNLLVATSVAAEGLDIPHCNVVRY    |     |
| Hef    | 395 | GIKAKRFVVGQASK-----QREQLLILDEFARGEFNVLVATSVGEEGLDVPEVDLVVYF   |     |
|        |     | VI                                                            |     |
| LGP2   | 457 | GLLTNEISMVQARGRA-RADQSVYAFVATEGSRELKRELINAELETINEQAVAAVQKMDQ  |     |
| Hef    | 445 | EPVPSAIRSIQRGRTRGRNMPGRVILMAKGTREAYYWSR-----                  |     |
| LGP2   | 516 | AEYQAKIRDLOQAALTKRAAQAAQRENQSQQFFVEHVQLLCINCMVAVGSGDLRQVEGT   |     |
| RigIRD | 901 | -----PDKENK-----LLCRKCKALACYTADVRIIEC                         |     |
| LGP2   | 576 | EHVNVNENFSNYNVSRRDPVINKVFKDVKFGGVISC--RNCGEVWGLQMIYKSVKLPVL   |     |
| RigIRD | 900 | HYTVLGDADFKECFVSRPHPK--PKQFSSFEKRAKIFCARQNCSDHWGIHVKYKTFEIPVI |     |
| LGP2   | 604 | KVRSMLELTPQGRIGA--KKNRVVYFVDFDFLQMCARENLSDLSLD                |     |
| RigIRD | 999 | KIESFVVEDIATGVQTLYSKKNKDFHFEKIPFDPAEKSK                       |     |

**B**

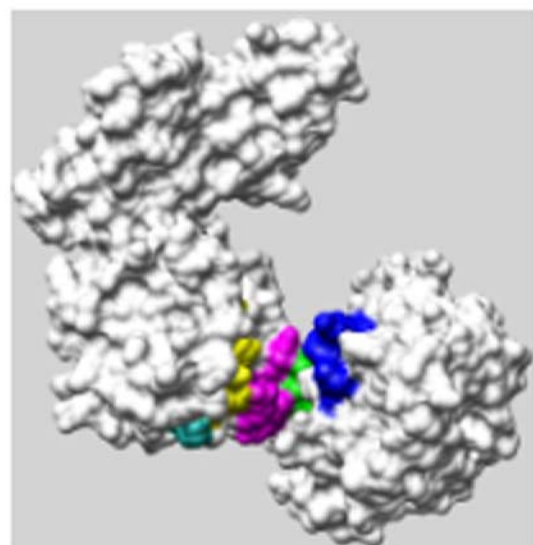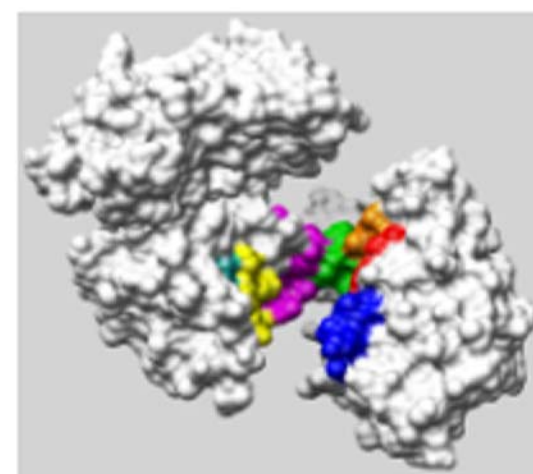

Score = 125 bits (315)  
 Identities = 26%,  
 Similarity = 44%,  
 Gaps = 9%

Supplemental Fig. 2. **LGP2-poly(I:C) complex** A) Electron micrograph of LGP2-PolyI:C complex. LGP2 oligomers are marked by ovals, while monomers and dimers are marked by diamonds and rectangles, respectively. The scale bar corresponds to 318 Å. The inset shows the dimensions of one of the oligomeric structures. B) Selected LGP2 oligomers observed in the micrographs.

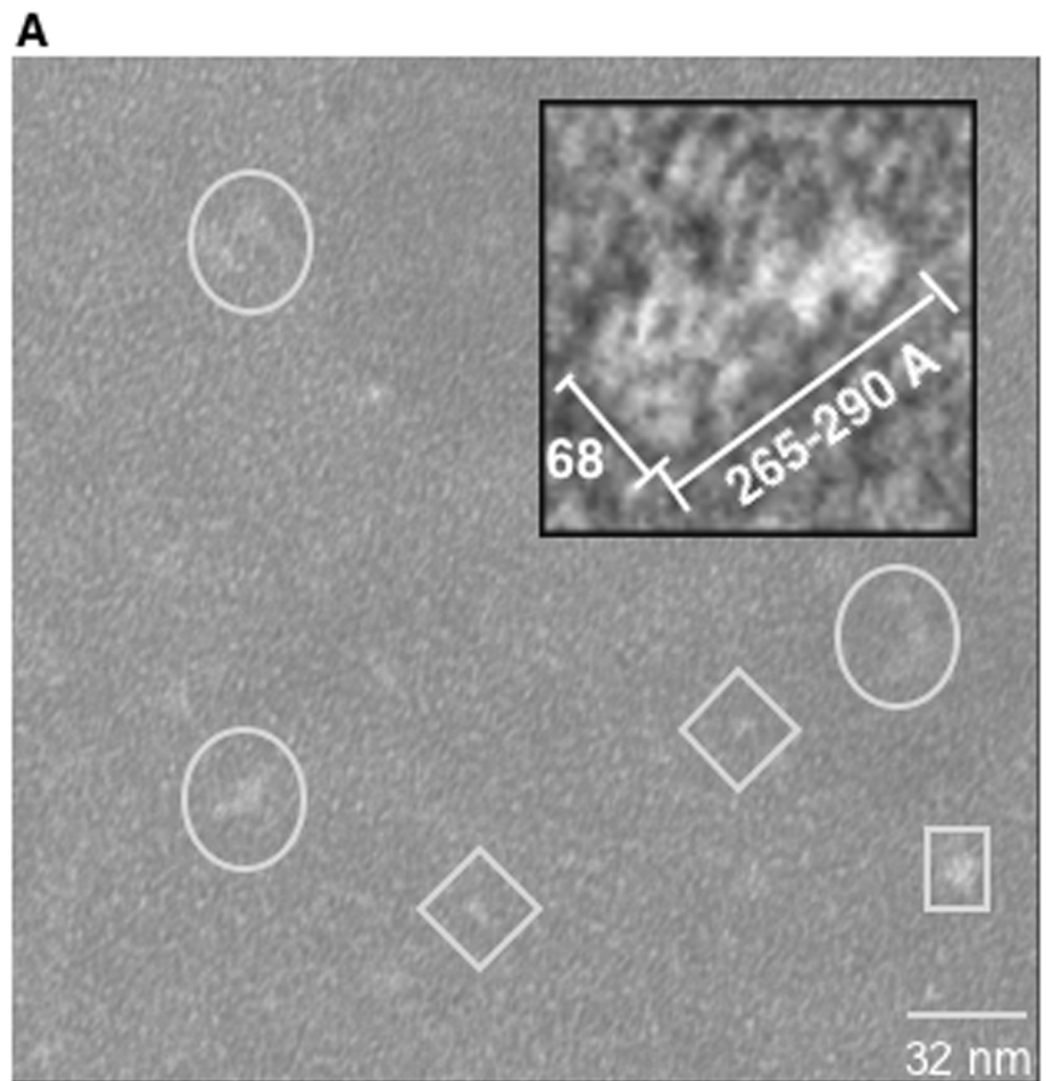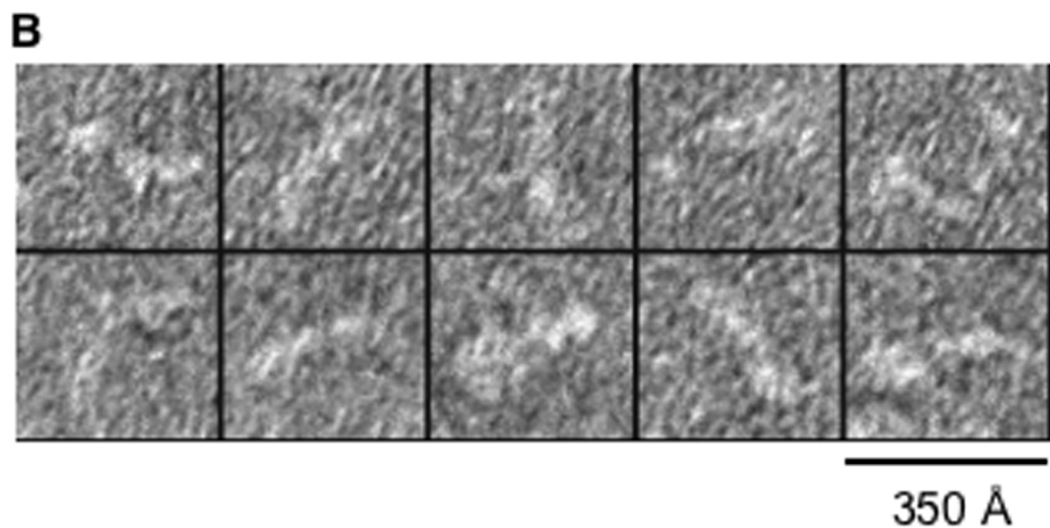

Supplement: supp_M800542200_Suppdata.pdf [file supp_M800542200_Suppdata.pdf]
